# Supplementary material
Source: publisher figshare collection journal article supplement (https://frontiersin.figshare.com/ndownloader/files/31590014)
Supplement: Supplementary file 1 [file 31590014]

Supplementary Material

**Table S1**. Agricultural intensification in Rwanda over 1961-2018 period (FAOSTAT data)

| Variables | | 1961-1970 | 2010 - 2018 | (%) |
| --- | --- | --- | --- | --- |
| Population | Population (103) | 3322.95 | 11257.38 | 238.78 |
| Rural Population (%) | 97.00 | 84.75 | -12.63 |
| Population Density (km-2) | 134.70 | 456.32 | 238.78 |
| Agriculture Surface | Agricultural Area (103 ha) | 1359.90 | 1816.37 | 33.57 |
| Arable Land (103 ha) | 507.10 | 1153.87 | 127.54 |
| Permanent Crops (103 ha) | 152.8 | 250 | 63.61 |
| Yield (ton ha-1) | Wheat | 0.78 | 1.55 | 98.28 |
| Rice | 2.12 | 4.14 | 98.48 |
| Maize | 1.19 | 1.89 | 55.52 |
| Sorghum | 1.20 | 1.16 | -3.16 |
| Vegetables | 5.42 | 6.09 | 12.33 |
| Fruits | 11.03 | 6.43 | -41.70 |
| Sugar cane | 26.01 | 15.45 | -40.60 |
| Livestock (106 heads) | Cattle | 0.57 | 1.20 | 110.23 |
| Goats | 0.44 | 2.73 | 515.66 |
| Sheep | 0.19 | 0.71 | 270.93 |
| Poultry | 0.45 | 4.99 | 1016.08 |
| Pigs | 0.04 | 1.24 | 2867.77 |
| Rabbits and hares | 0.03 | 1.19 | 3506.82 |
| Import feed  (103 tons) | Barley | 0.02 | 0.019 | -17.72 |
| Fruits | 0.02 | 12.64 | 81986.85 |
| soybeans | 0.00 | 2.19 |  |
| Cake, soybeans | 0.00 | 1.82 |  |
| Wheat | 0.02 | 115.19 | 57869.55 |
| Maize | 0.00 | 101.02 |  |
| Vegetables | 0.30 | 10.59 | 3385.84 |
| Diets | Protein supply quantity (g capita-1day-1) | 53.96 | 58.63 | 8.65 |
| Animal protein supply quantity (g capita-1day-1) | 2.68 | 7.53 | 181.00 |
| Proportion Animal Protein (%) | 5.00 | 12.82 | 156.22 |

**Table S2**. N imported and exported from Rwanda (FAOSTAT, 2018).

| **Variables** | | **1961-1970** | **2010-2018** | **(%)** |
| --- | --- | --- | --- | --- |
| **N trade**  **(103 tons)** | **Total N import** | 0.08 | 9.22 | 12129.06 |
| N import plant-derived Food | 0.08 | 9.09 | 12204.31 |
| N import animal-derived Food | 0.0 | 0.13 |  |
| Total N export | 0.13 | 4.11 | 2948.30 |
| N export plant derived Food | 0.13 | 3.25 | 2402.69 |
| N export animal derived Food | 0.00 | 0.87 |  |
|  | Imported N fertilizer | 0.03 | 5.017 | 18619 |
| **N fertilizers (103 tons)** | Exported N fertilizer | 0.00 | 0.00 |  |
|  | N agriculture use | 0.07 | 5.017 | 7388.772 |

**Table S3**. Emissions factors used to estimate NH3 and NO emitted from farmlands

| Gaseous N emissions | | Synthetic N | Manure N |  | Reference |
| --- | --- | --- | --- | --- | --- |
| NH3 | Upland-crops | 0.16 | 0.3 |  | (Bouwman et al., 2002) |
|  | Wetland-rice | 0.01 | 0.17 |  |
| NO |  | 1.40 | 0.13 |  | (FAO, 2001) |

**References**

FAO. FAOSTAT Statistical Database. Available from: http://www.fao.org/faostat/en/#data [Accessed January 26, 2021].

Bouwman, A. F., Boumans, L. J. M., and Batjes, N. H. (2002). Emissions of N2O and NO from fertilized fields: Summary of available measurement data. *Global Biogeochem. Cycles* 16. doi:10.1029/2001gb001811.

FAO (2001). Global estimates of gaseous emissions of NH3, NO and N2O from agricultural land. Available at: http://www.fao.org/3/Y2780E/y2780e00.htm [Accessed January 27, 2021].
